# Supplementary material
Source: Research Square preprint supplement (doi:10.21203/rs.3.rs-9607146/v1)
Supplement: Supplementary file 1 [file a9ad296cc70c7823283823f0.docx]

**Supplementary Information**

**Red Blood Cells in Polycythemia Vera:
Alterations in Hemoglobin Structure and Oxygen Affinity**

Jakub Dybas1,*, Weronika Lebowa2,3, Ewa Szczesny-Malysiak1, Amanda Bartkowiak1,Marta Targosz-Korecka4, Tomasz Sacha2,5,#, Stefan Chlopicki1,6,#

*1Jagiellonian Center for Experimental Therapeutics, Jagiellonian University,
14 Bobrzynskiego St., 30-348 Krakow, Poland*

*2Department of Haematology, Jagiellonian University Hospital,
2 Jakubowskiego St., 30-688 Krakow, Poland*

*3Doctoral School of Medical and Health Sciences, Jagiellonian University Medical College,*

*16 Sw. Lazarza, 31-530 Krakow, Poland*

*4Faculty of Physics, Institute of Astronomy and Applied Computer Science, Jagiellonian University,
11 Lojasiewicza St., 30-348 Krakow, Poland*

*5Chair of Haematology, Faculty of Medicine, Jagiellonian University Medical College,
12 Sw. Anny St., 30-008 Krakow, Poland*

*6Chair of Pharmacology, Faculty of Medicine, Jagiellonian University Medical College,
16 Grzegorzecka St., 31-531 Krakow, Poland*

***Corresponding author**

Email: jakub.dybas@uj.edu.pl

**#These authors share senior authorship**

**ORCID numbers**

Jakub Dybas – 0000-0003-2202-5068

Weronika Lebowa – 0000-0002-8609-0478

Ewa Szczesny-Malysiak – 0000-0002-6356-6453

Amanda Bartkowiak – 0000-0002-7890-5665

Marta Targosz-Korecka – 0000-0001-5650-7255

Tomasz Sacha – 0000-0002-7207-6595

Stefan Chłopicki – 0000-0002-2878-3858

**Keywords
Hemoglobin structure, red blood cells, Polycythemia Vera**

|  | | | Study sample | | | | p value |
| --- | --- | --- | --- | --- | --- | --- | --- |
| **Research group (PV)** | | | **Control group** |
| Group size* | | | 17 | | | 16 |  |
| **Sex** | Female, n (%) | | 11 (64.7) | | | 11 (68.8) |  |
| Male, n (%) | | 6 (35.3) | | | 5 (31.2) |  |
| **Age** | Distribution** | | normal | | | normal |  |
| Mean (SD) | | 55.4 (14.8) | | | 45.5 (18.6) | 0.107 |
| Blood count | | | | | | | |
| **RBC** (red blood cells)  [x 106/ µl] | | Median (Q1; Q3) | | 4.8 (4.5; 5.2) | | 4.5 (4.3; 4.7) | **0.03** |
| **Hgb** (hemoglobin) [g/dl] | | Median (Q1; Q3) | | 14.8 (13.8; 15.8) | | 13.3 (12.8; 14.0) | **<0.001** |
| **Hct** (hematocrit) [%] | | Median (Q1; Q3) | | 42.9 (39.3; 46.3) | | 39.7 (38.6; 41.3) | **0.02** |
| **RDW-SD** (red blood cell distribution width – standard deviation) [fl] | | Median (Q1; Q3) | | 48.5 (45.4; 52.6) | | 40.8 (38.8; 43.8) | **<0.001** |
| **RDW-CV** (red blood cell distribution width – coefficient of variation) [%] | | Median (Q1; Q3) | | 14.6 (13.6; 16.6) | | 12.6 (12; 13.6) | **0.007** |
| **MCV** (mean corpuscular volume) [fl] | | Median (Q1; Q3) | | 88.8 (84; 100.9) | | 88.3 (85.3; 89.8) | 0.363 |
| **WBC** (white blood cells)  [x 103/ µl] | | Median (Q1; Q3) | | 5.4 (4.5; 8.8) | | 6.8 (4.8; 9.1) | 0.711 |
| **PLT** (platelets) [x 103/ µl] | | Median (Q1; Q3) | | 289 (258; 359.5) | | 254 (227.5; 277.5) | 0.1 |
| **Ferritin** [µg/l] | | Median (Q1; Q3) | | 176 (65; 221) | | 103 (48; 150) | 0.089 |
| **Characteristics of the research group** | | | | | | | |
| High-risk PV***; n (%) | | | | | 7 (41.2) | | |
| Thrombotic event; n (%) | | | | | 3 (17.6) | | |
| Type of treatment; n (%)  Ropeginterferon alfa 2b  Peginterferon alfa 2a  Ruxolitinib  Hydroxyurea | | | | | 7 (41.2)  3 (17.6)  1 (5.9)  6 (35.3) | | |

**Table S1.** Demographic and clinical characteristics of the patients with PV (research group) and healthy subjects (control group). *In the research group, blood samples were taken at two different time points in 3 patients (there were a total of 20 research samples); **Based on the Shapiro-Wilk test; ***Age over 60 years and/ or history of thrombotic event


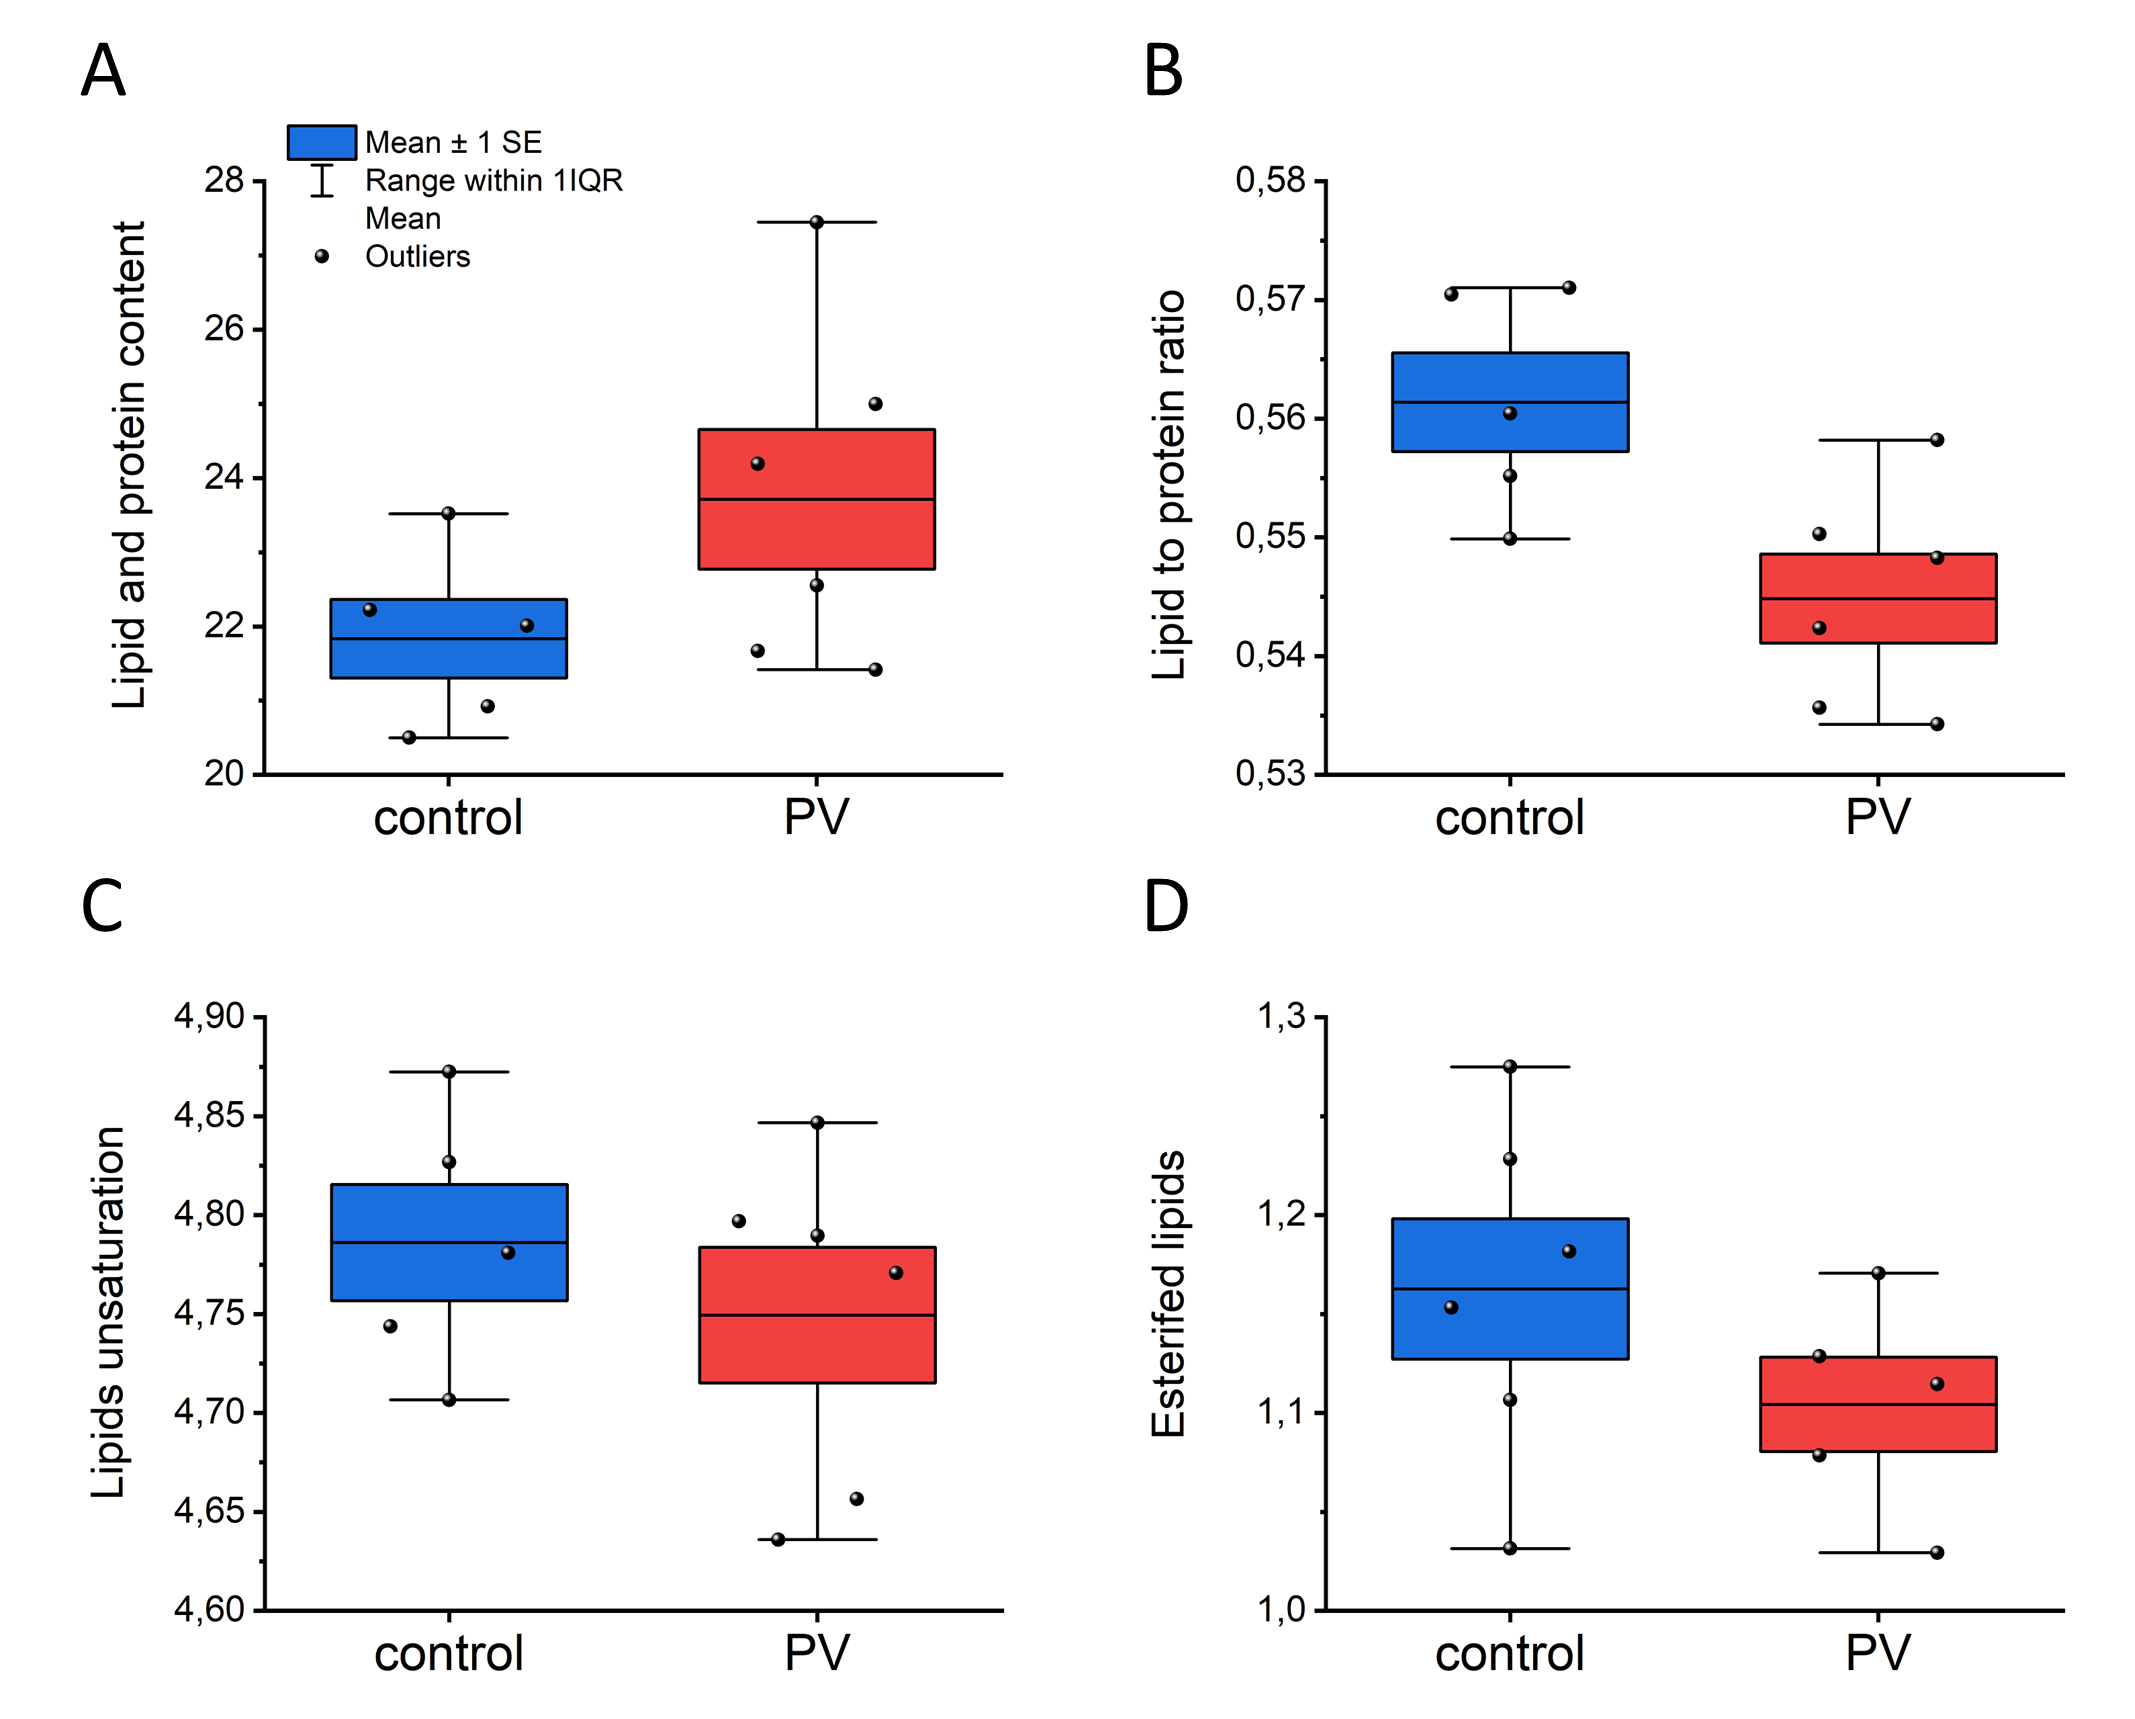


***Figure S1.*** *Ratios calculated for the integral intensities in Raman spectra of the isolated RBC membranes (ghost RBCs) – control sample (blue boxes) and PV sample (red boxes). The integration regions and band assignments used to construct the boxes were described in detail by Dybas et al.*24*. Boxes are presented as mean values with standard error (SE), and whiskers correspond to the interquartile range.*


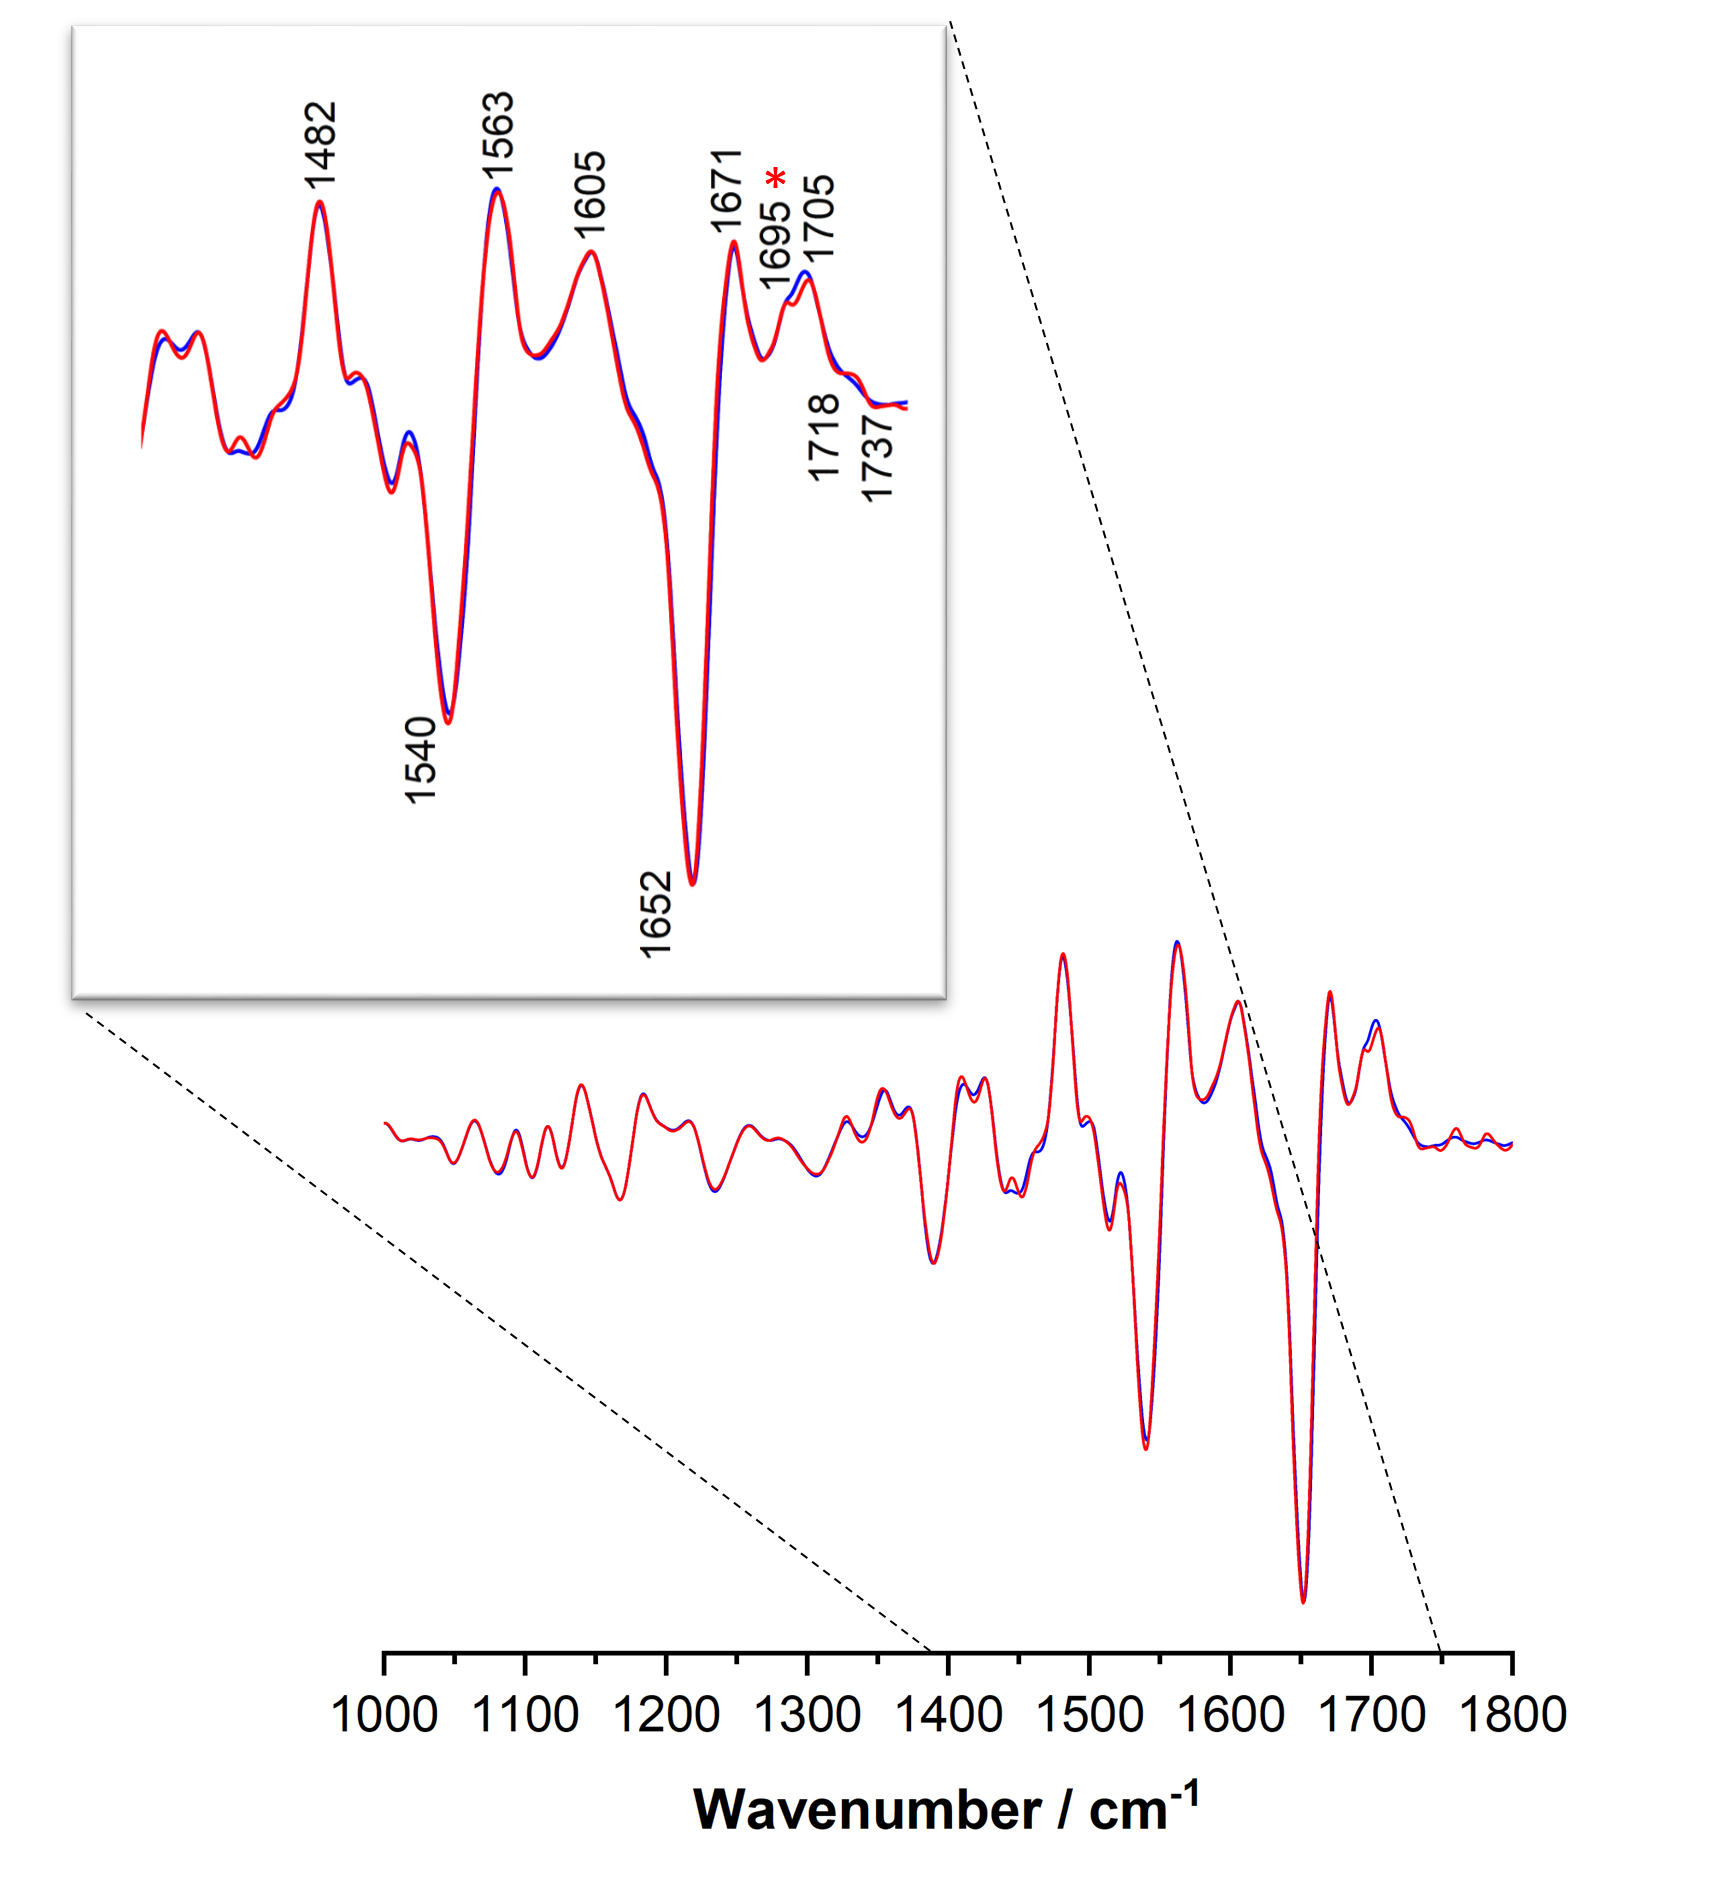


***Figure S2.*** *Averaged second derivatives of FTIR-ATR spectra of studies studied isolated RBC samples – control sample (blue line, healthy subject) and test sample (red line, patient with polycythemia vera). The spectra were averaged from six independent samples (N=6), within each measurement was repeated three times using 5 µl of isolated RBCs, and are presented within the 1000 – 1800 cm–1 range.*


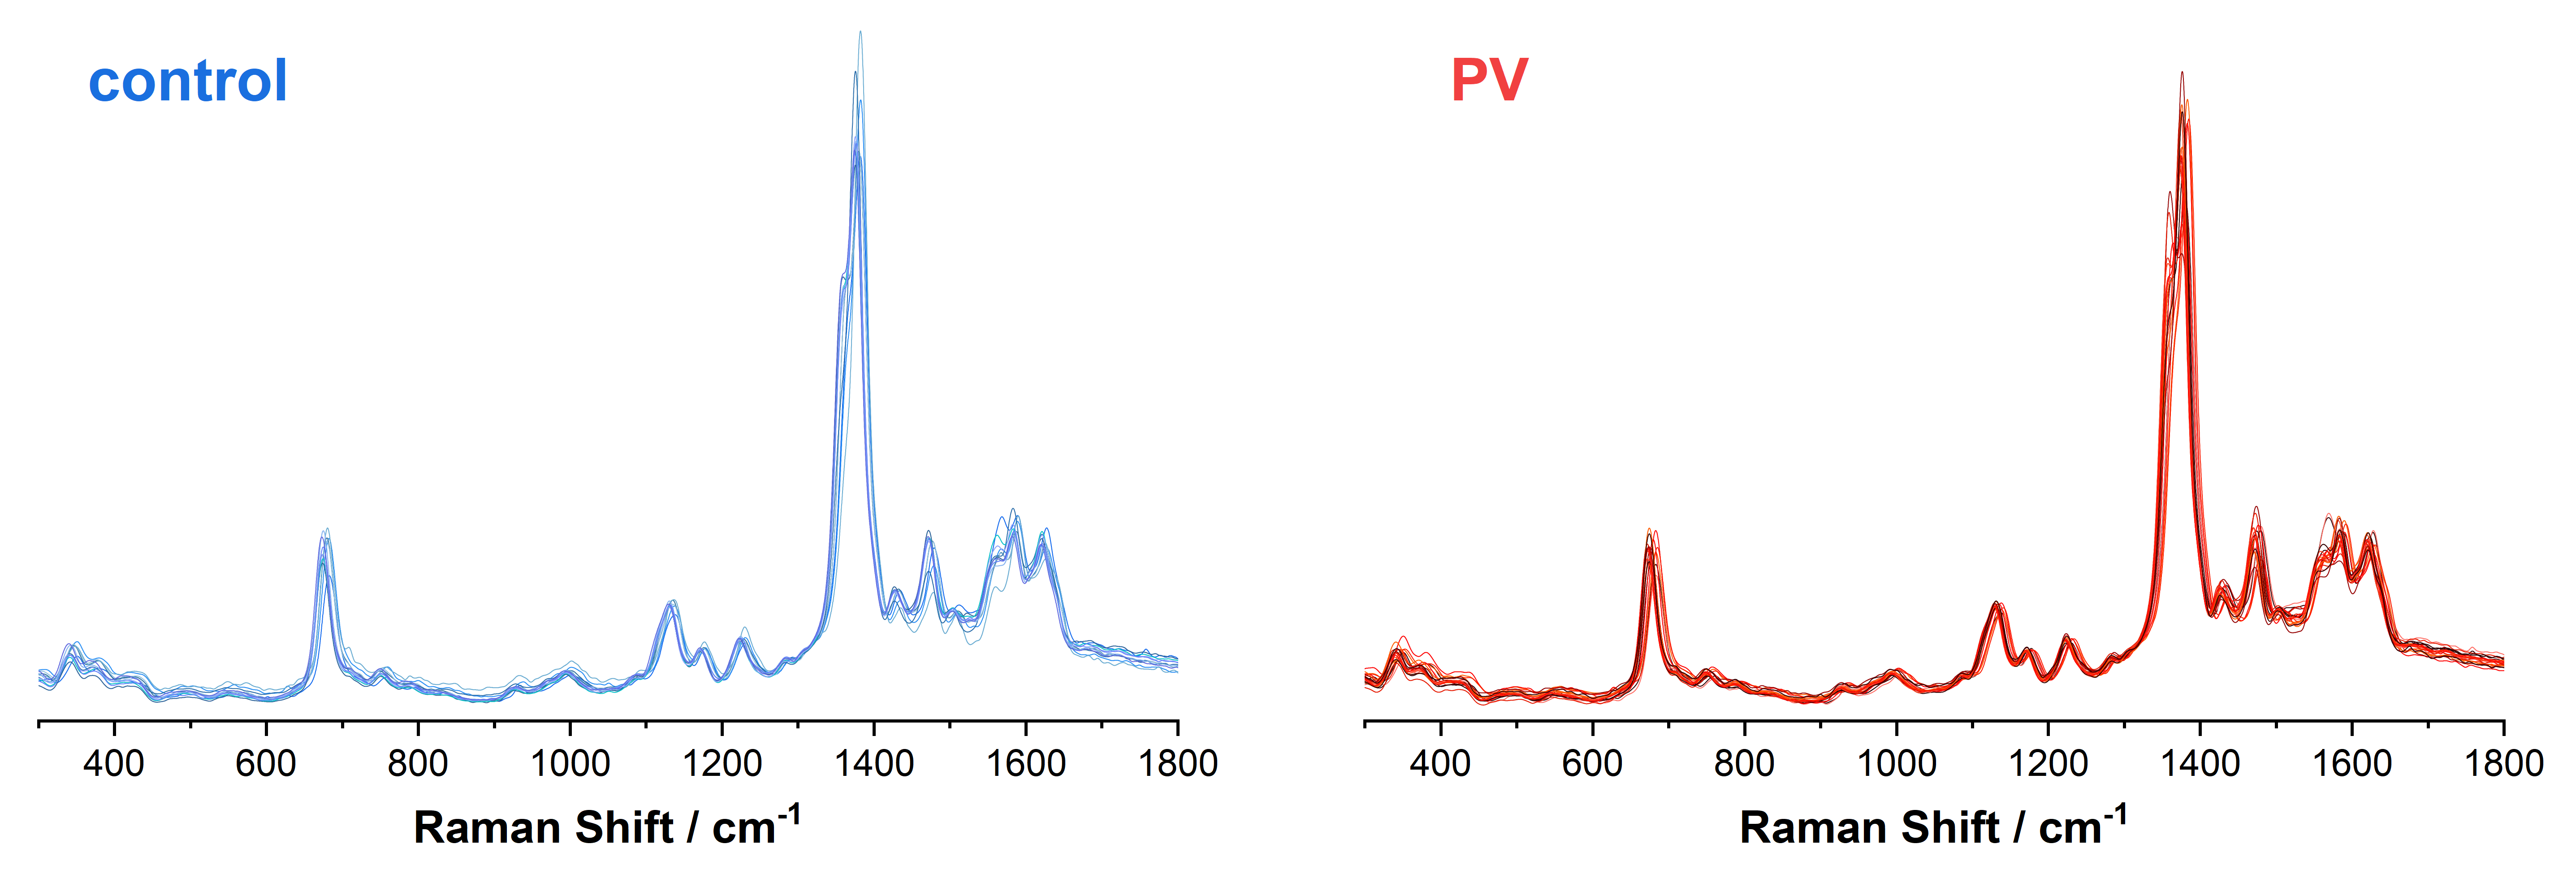


***Figure S3.*** *Average RR spectra of the isolated RBC – control sample (blue lines, healthy subjects) and PV sample (red lines, patients with polycythemia vera). Each spectrum corresponds to one patient and represents an average from approximately 100 single erythrocytes measured with 405 nm excitation and 0.1 mW laser power. The spectra were normalized and are presented within the 300 – 1700 cm–1 spectral range.*


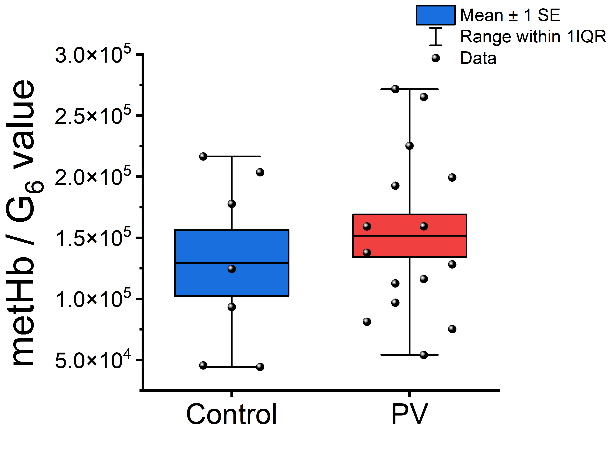


***Figure S4.*** *Quantification of methemoglobin from the EPR spectra. Data was acquired from N=9–15. Boxes are presented as mean values with standard error (SE), and whiskers correspond to the interquartile range.*
